# Supplementary material for: A novel small-molecule PROTAC selectively promotes tau clearance to improve cognitive functions in Alzheimer-like models
Source: PubMed Central journal article supplement (PMC8039949; doi:10.7150/thno.55680), 2021-03-11
Supplement: thnov11p5279s1.pdf [file thnov11p5279s1.pdf]

# 1 Supplementary Materials

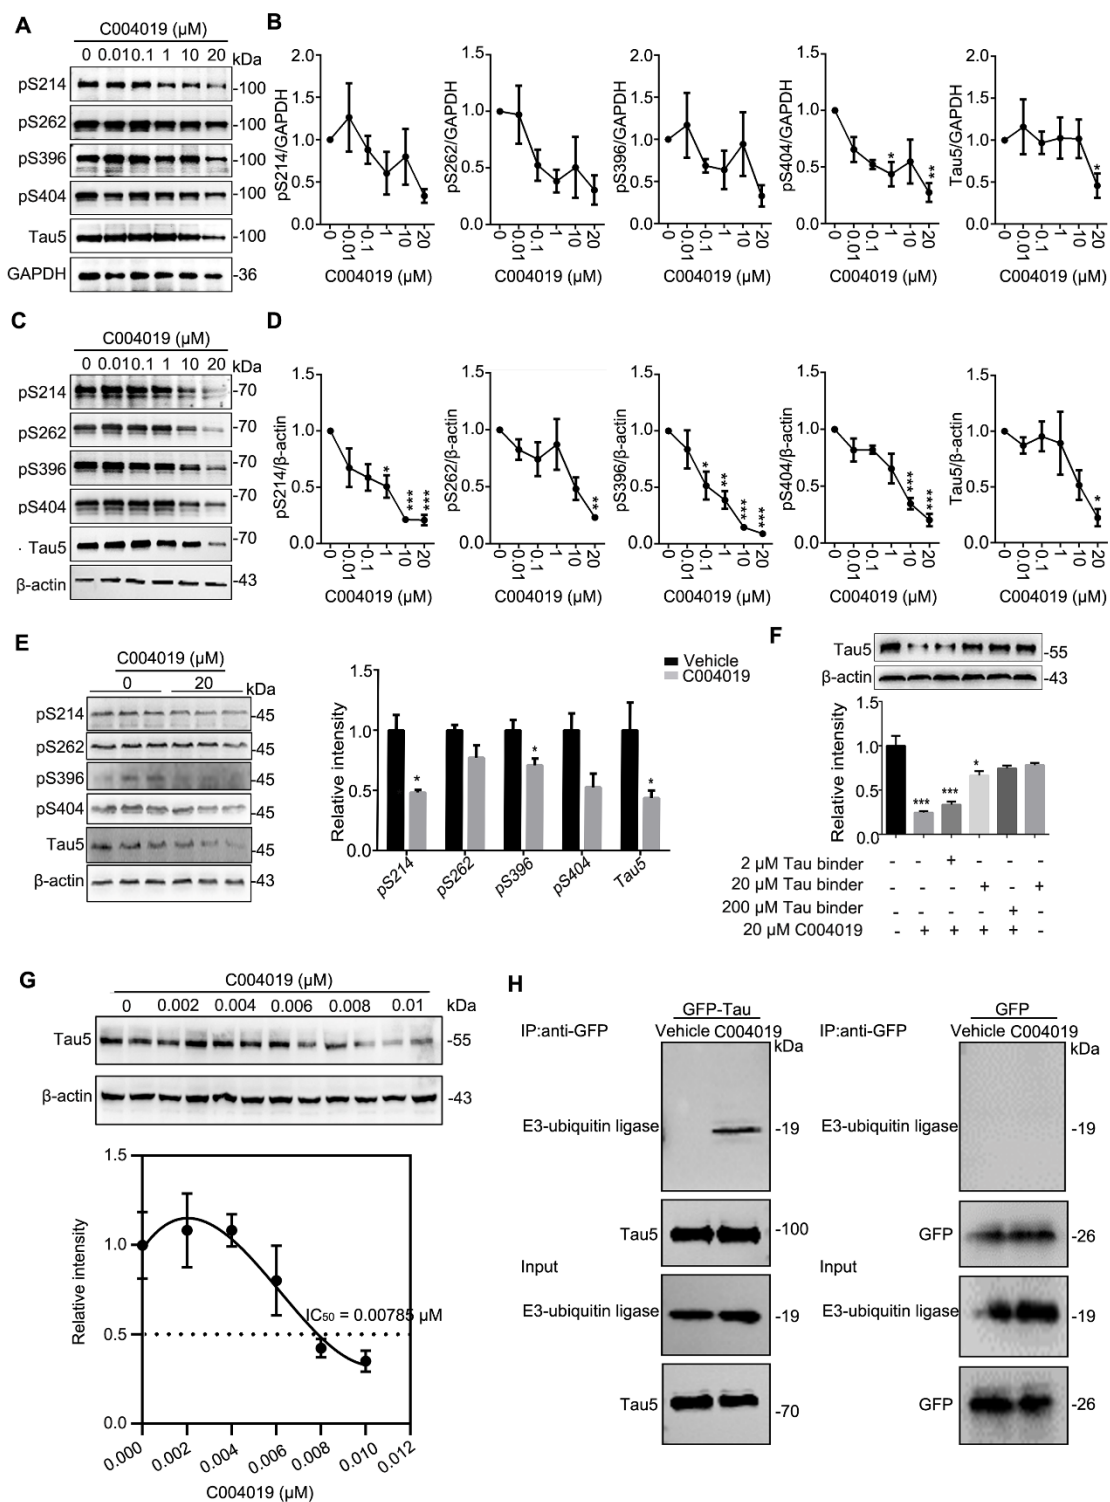

2

3 **Figure S1 C004019 induces tau reduction in HEK293 cells with transient**  
 4 **hTau expression in E3-ubiquitin-dependent manner.**

5 (A-D) HEK293 cells with transient transfection of EGFP-hTau (A-B) and

6 3xFlag-hTau (C-D) were incubated with C004019 of different concentrations (0,  
7 0.01, 0.1, 1, 10, 20  $\mu\text{M}$ ) for 24 h, and a concentration-dependent tau reduction  
8 was detected by Western blotting.

9 (E) C004019 (20  $\mu\text{M}$ ) decreased phosphorylated tau in SH-SY5Y cells  
10 measured by Western blotting.

11 (F) Tau binder at high concentrations (20  $\mu\text{M}$  and 200  $\mu\text{M}$ ) blocked the effect of  
12 C004019 in removing tau proteins in HEK293-hTau cells treated with different  
13 concentrations of tau binder (2  $\mu\text{M}$ , 20  $\mu\text{M}$ , and 200  $\mu\text{M}$ ) and 20  $\mu\text{M}$  C004019  
14 measured by Western blotting.

15 (G) HEK293-hTau cells were incubated with C004019 of different lower  
16 concentrations (0, 0.002, 0.004, 0.006, 0.008, 0.01  $\mu\text{M}$ ) for 24 h, and a lower  
17 concentration-dependent tau reduction was detected by Western blotting,  $\text{IC}_{50}$   
18 = 0.00785  $\mu\text{M}$ .

19 (H) C004019 induced interaction of tau with E3-ubiquitin ligase (Vhl) in  
20 EGFP-hTau cells (left) measured by immunoprecipitation using GFP antibody  
21 and Western blotting using anti-Vhl and Tau5, respectively. HEK293 transiently  
22 transfected EGFP-vector and treated with C004019 was used as a negative  
23 control (right).

24 Data were expressed as mean  $\pm$  SEM, (B, D, E, F) \*P < 0.05, \*\*P < 0.01, \*\*\*P <  
25 0.001 vs. 0  $\mu\text{M}$ . Data in (B, D, F, G) were analyzed by one-way ANOVA. Data  
26 in (E) were analyzed by Student's t-test.

27

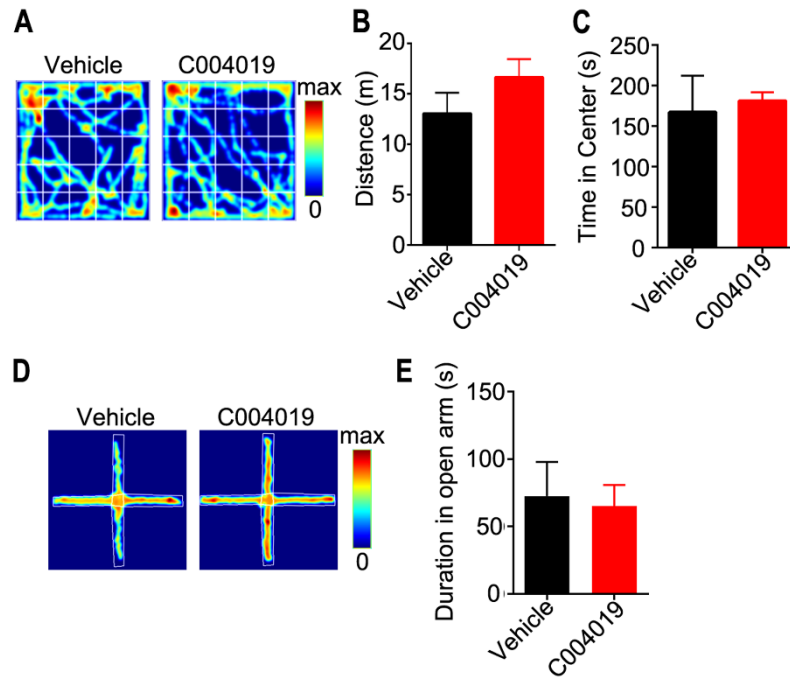

28

29 **Figure S2 C004019 did not affect motor ability and anxiety level of hTau**  
 30 **mice.**

31 **(A-C)** C004019 treatment did not change the movement distance and the time  
 32 spent staying in center during open field test (OFT) in hTau transgenic mice.

33 **(D-E)** C004019 did not affect open arm duration in elevated plus maze (EPM)  
 34 test.

35 Data were expressed as mean  $\pm$  SEM (n = 5 ~ 6 for each group), Data were  
 36 analyzed by Student's t-test.

37

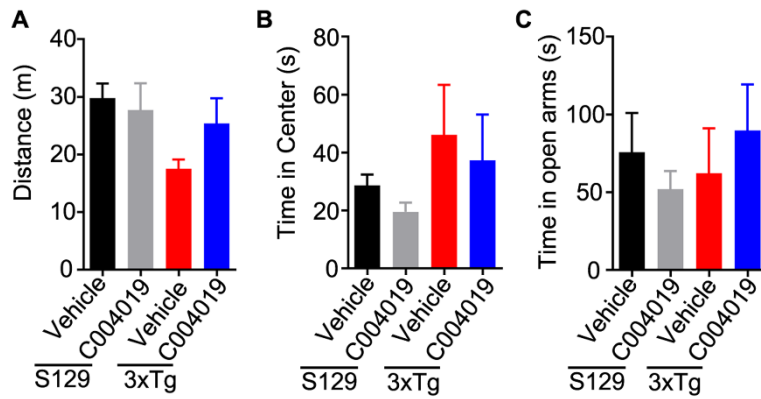

38

39 **Figure S3 C004019 did not affect motor ability and anxiety level of**  
 40 **3xTg-AD mice.**

41 **(A-B)** C004019 did not affect movement distance and center duration in OFT.

42 **(C)** C004019 did not affect the open arm duration in EPM test.

43 Data were expressed as mean  $\pm$  SEM (n = 9 ~ 10 for each group). Data were

44 analyzed by one-way ANOVA.
